# Supplementary material for: C3v-symmetric anion receptors with guanidine recognition motifs for ratiometric sensing of fluoride
Source: Royal Society of Chemistry journal article supplement (doi:10.1039/c5ra26039f), 2016-01-01
Supplement: c5ra26039f1.pdf [file c5ra26039f1.pdf]

### Supplementary data

## $C_{3v}$ -Symmetric anion receptors with guanidine recognition motifs for ratiometric sensing of fluoride

Won Kim<sup>a</sup>, Suban K Sahoo<sup>a,b</sup>, Gi-Dong Kim<sup>a</sup>, and Heung-Jin Choi<sup>a\*</sup>

<sup>a</sup> Department of Applied Chemistry, Kyungpook National University, Daegu, 702-701, South Korea.

<sup>b</sup> Department of Applied Chemistry, SV National Institute of Technology, Surat-395007, Gujrat, India.

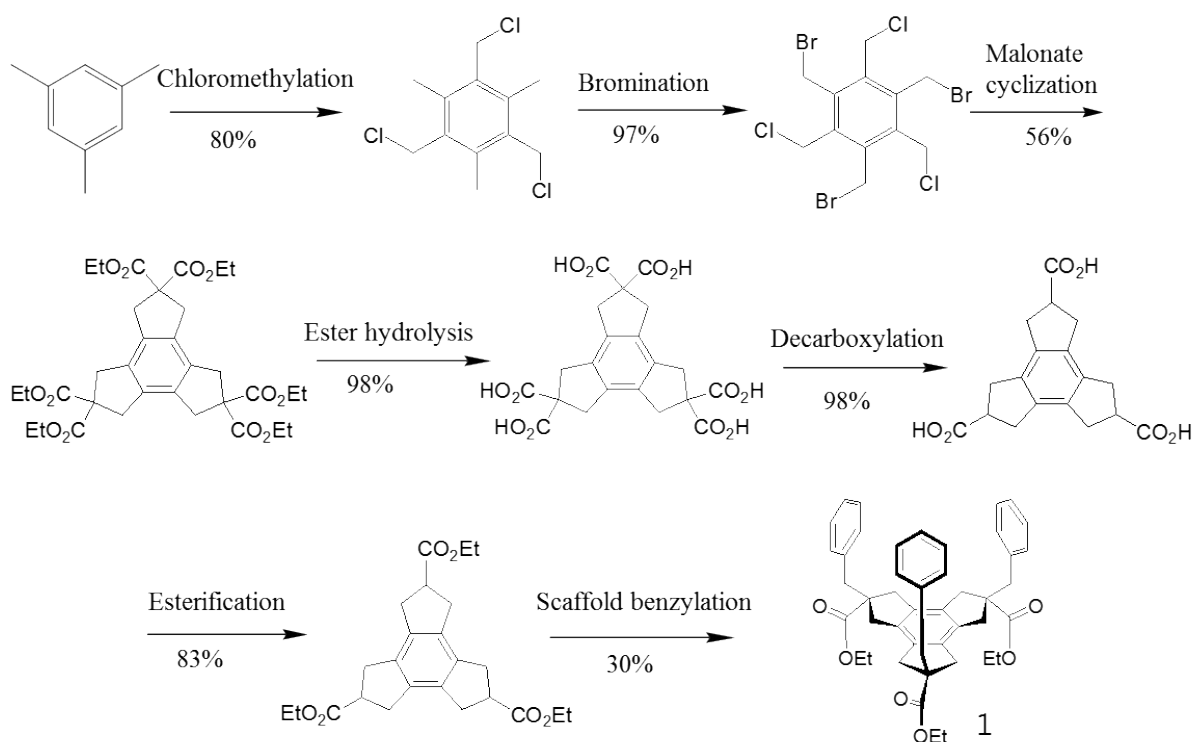

**Scheme S1.** Synthesis of trindane tricarboxylic ester scaffold (*reference no. 26 may be referred for reagents used*).

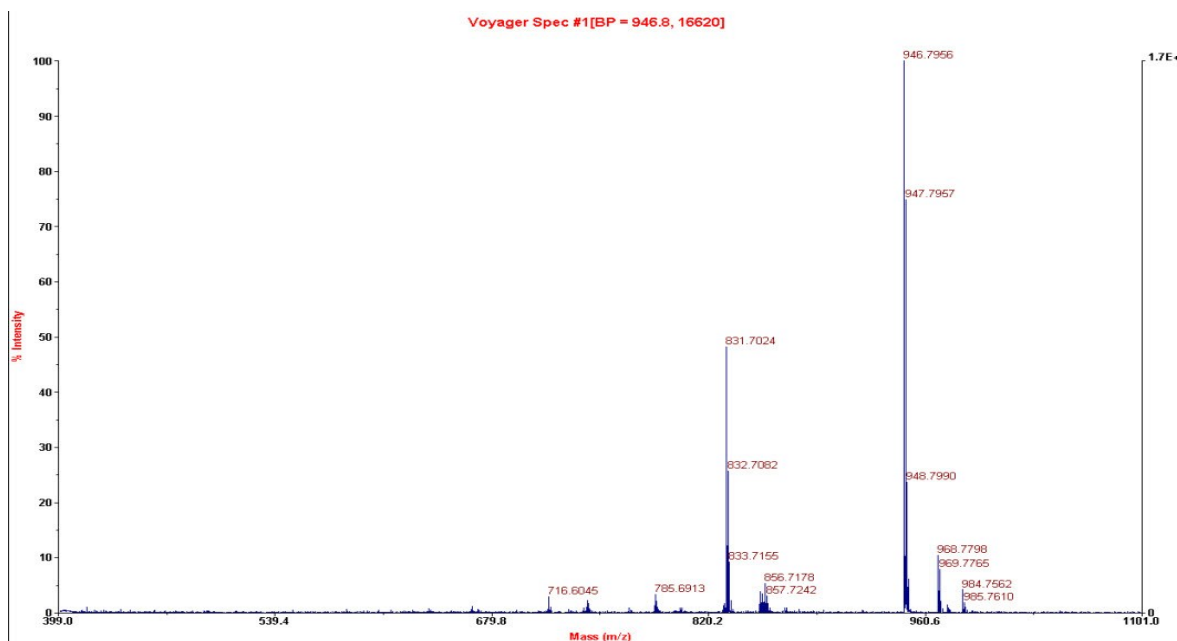

Fig. S1a. MALDI-TOF mass spectrum of **3**.

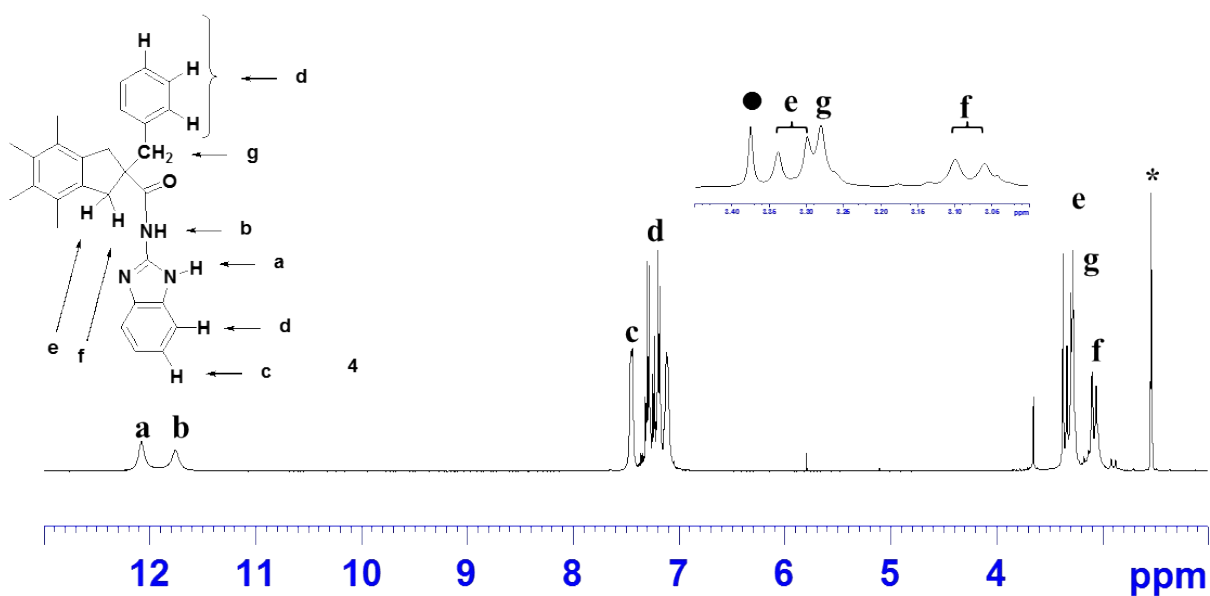

Fig. S1b. <sup>1</sup>H NMR spectrum of receptor **3** in DMSO-*d*<sub>6</sub> (400 MHz, \*DMSO, ●H<sub>2</sub>O).

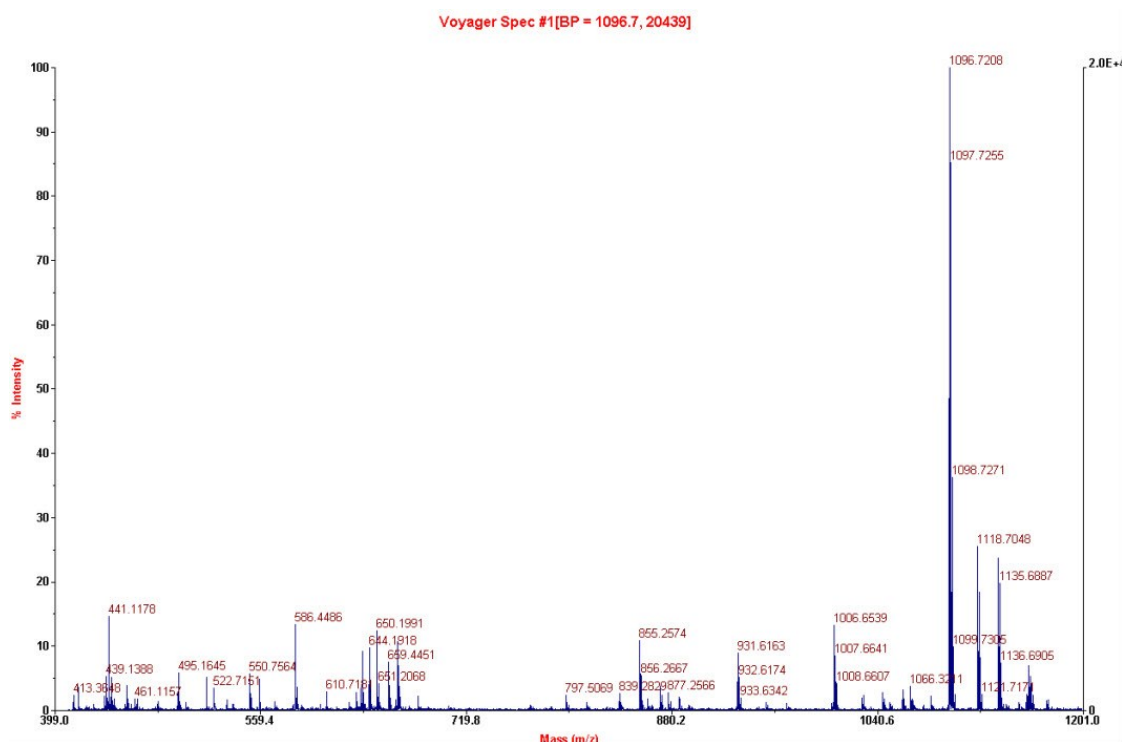

**Fig. S2a.** MALDI-TOF mass spectrum of **4**.

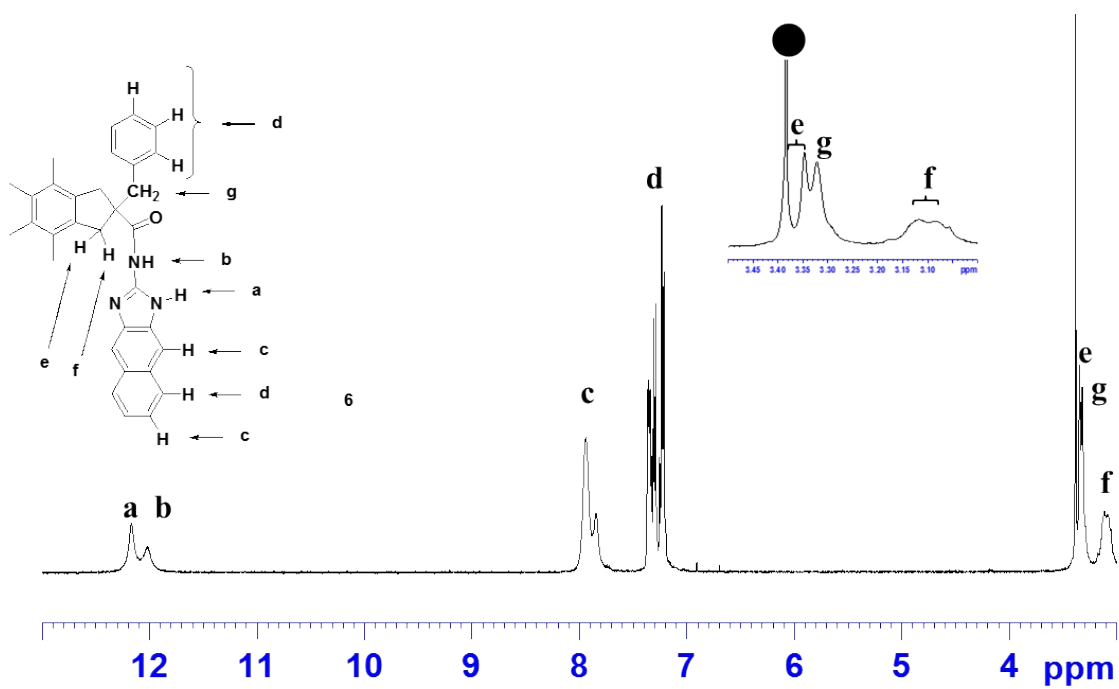

**Fig. S2b.** <sup>1</sup>H NMR spectrum of receptor **4** in DMSO-*d*<sub>6</sub> (400 MHz, ●H<sub>2</sub>O).

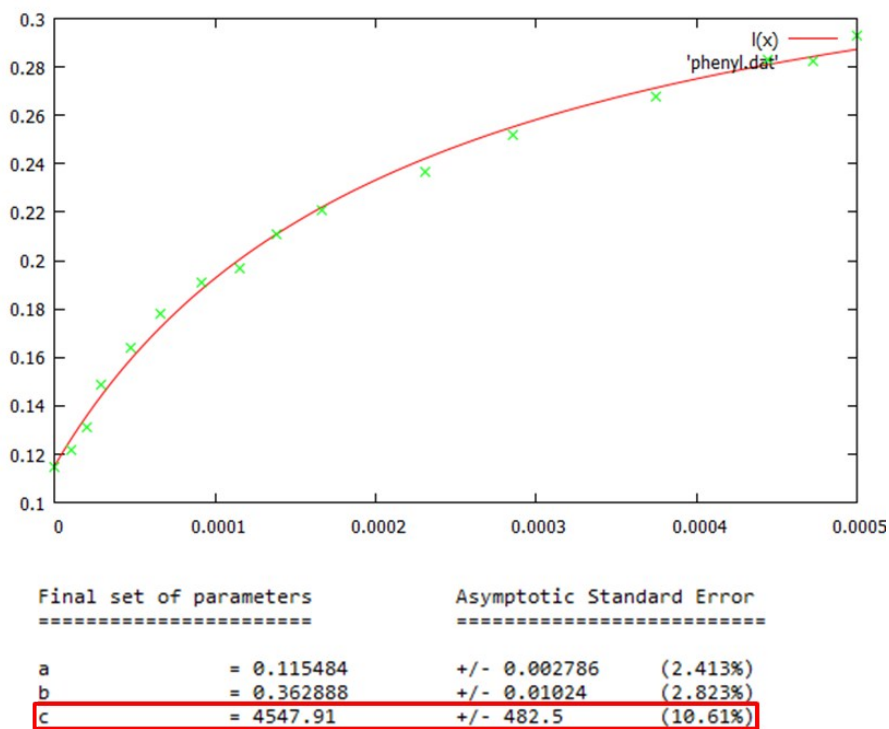

**Fig. S3a.** Fitting of absorption titration data of **3** during the estimation of binding constant of **3.F**.

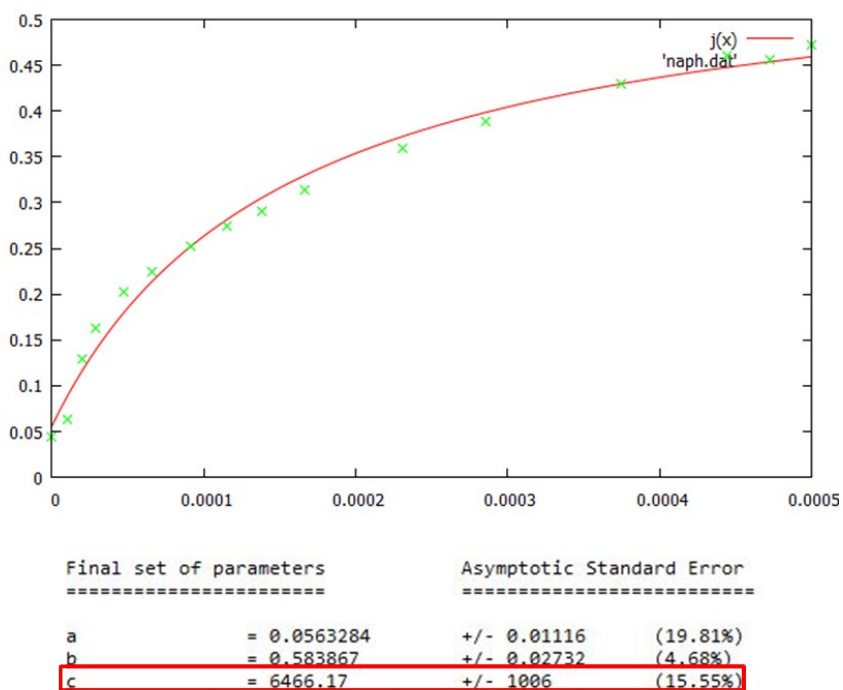

**Fig. S3b.** Fitting of absorption titration data of **4** during the estimation of binding constant of **4.F**.

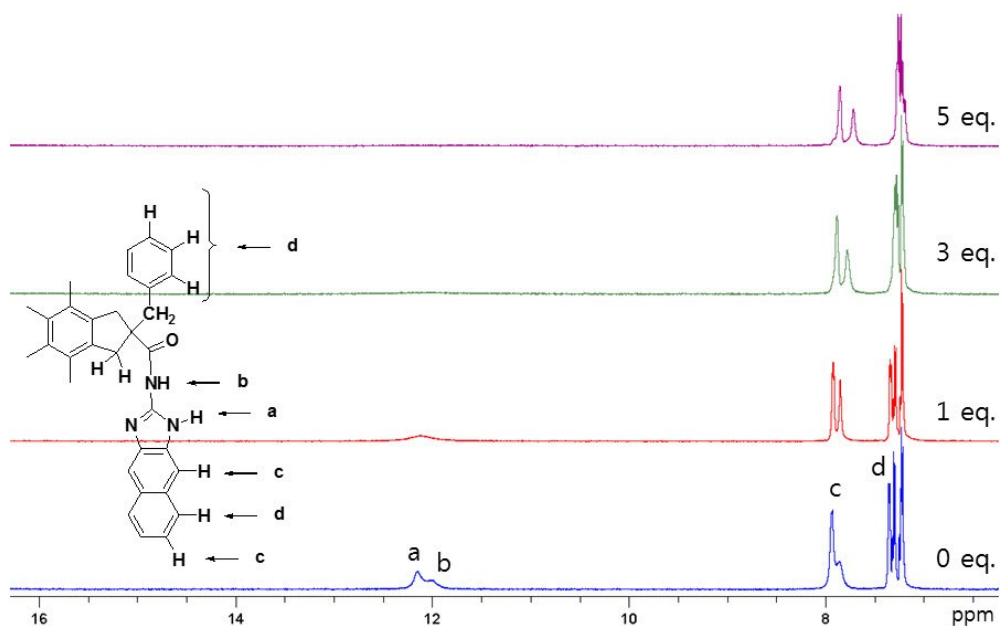

**Fig. S4.** Partial  $^1\text{H}$  NMR spectral changes of a  $\text{DMSO-}d_6$  solution of **4** (4 mM) upon addition of TBAF.

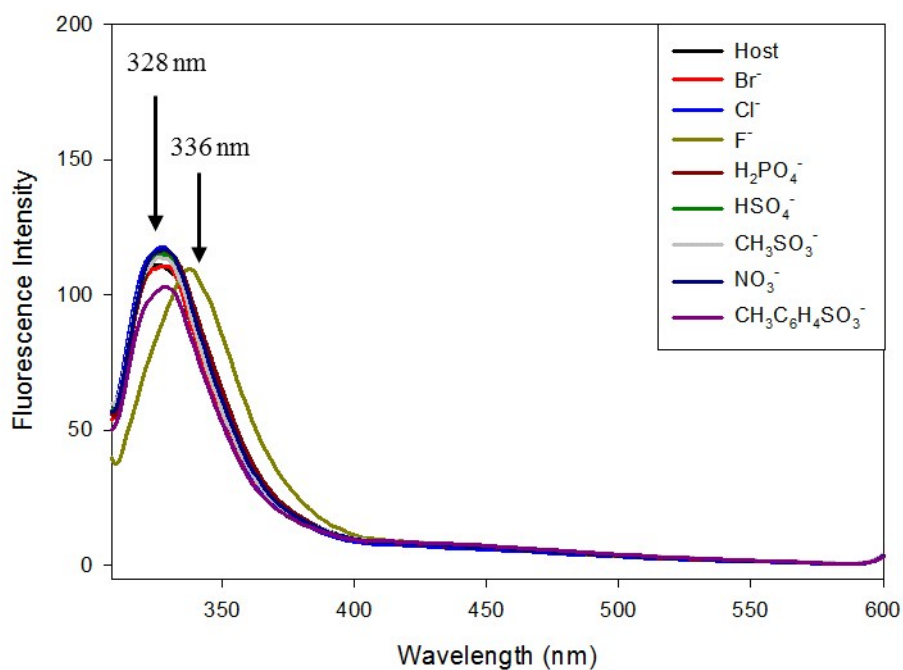

**Fig. S5.** Fluorescence intensity of receptor **3** (10  $\mu\text{M}$ ) with various TBA anion salts (1000  $\mu\text{M}$ ) in DMSO ( $\lambda_{\text{ex}}=299$  nm).

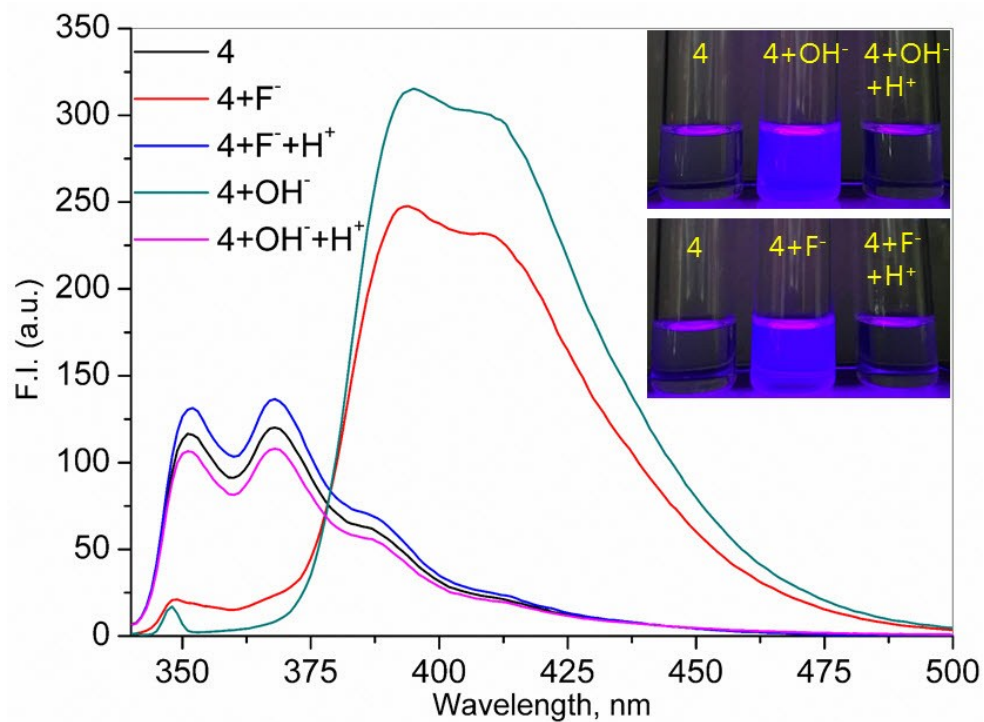

**Fig. S6.** Reversibility test of **4**: fluorescence turn-on at 410 nm in presence of TBAF and NaOH, and reversed back upon addition of HCl.

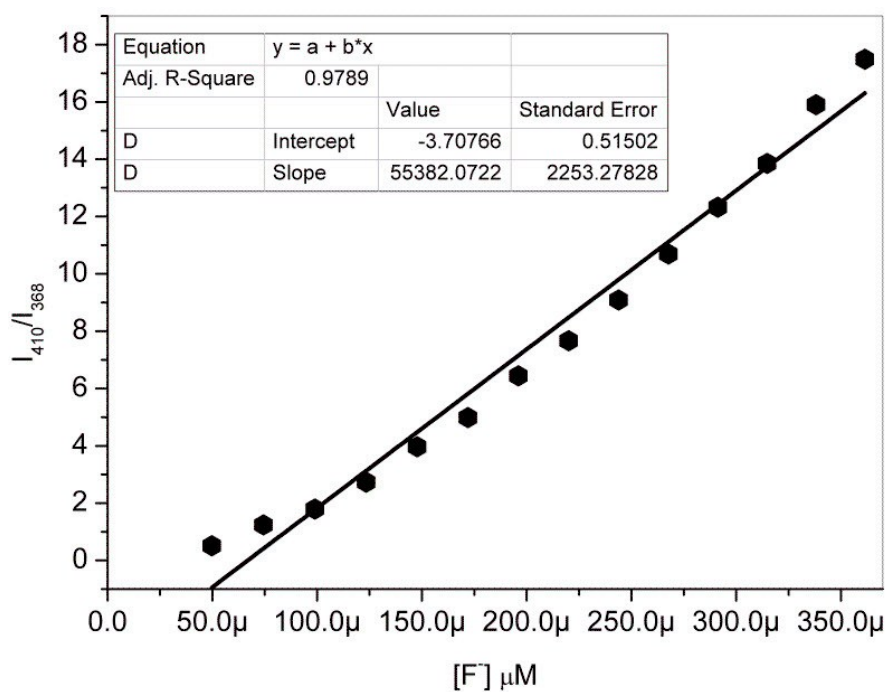

**Fig. S7.** Calibration curve for the determination of F<sup>-</sup> detection limit of **4**.

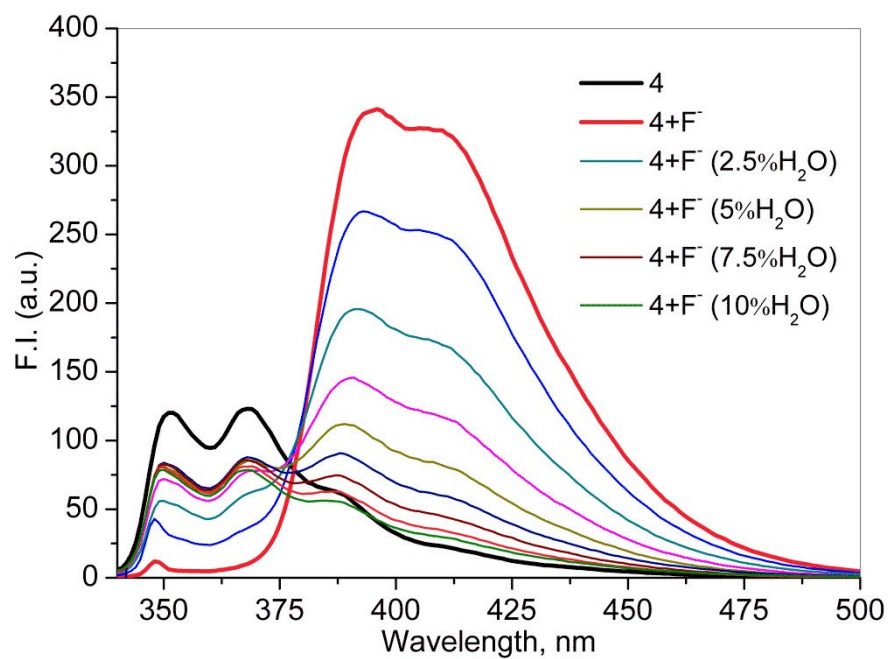

**Fig. S8.** Water tolerance of **4** (5  $\mu\text{M}$ ) containing 50 equivalents of TBAF.

\*\*\*\*\*
